# Supplementary material for: ICAM1 antibody drug conjugates exert potent antitumor activity in papillary and anaplastic thyroid carcinoma
Source: PubMed Central journal article supplement — iScience. 2023 Jul 3;26(8):107272. doi: 10.1016/j.isci.2023.107272 (PMC10371847; doi:10.1016/j.isci.2023.107272), 2023-07-03
Supplement: mmc1.pdf [file mmc1.pdf]

**Supplemental information**

**ICAM1 antibody drug conjugates exert potent antitumor  
activity in papillary and anaplastic thyroid carcinoma**

**Peng Zhang, Changjuan Tao, Takaya Shimura, Andrew C. Huang, Nana Kong, Yujie Dai, Shili Yao, Yun Xi, Xing Wang, Jianmin Fang, Marsha A. Moses, and Peng Guo**

**Figure S1. Identification of DEGs in 3 PTC datasets according to GEO. Related to Figure 1.** (A) Volcano plots of the differential expression analysis for GSE3467, GSE33630 and GSE50901; (B) protein-protein interaction (PPI) analysis of DEGs performed by STRING; (C) identified hub gene by Cytoscape with different methods.

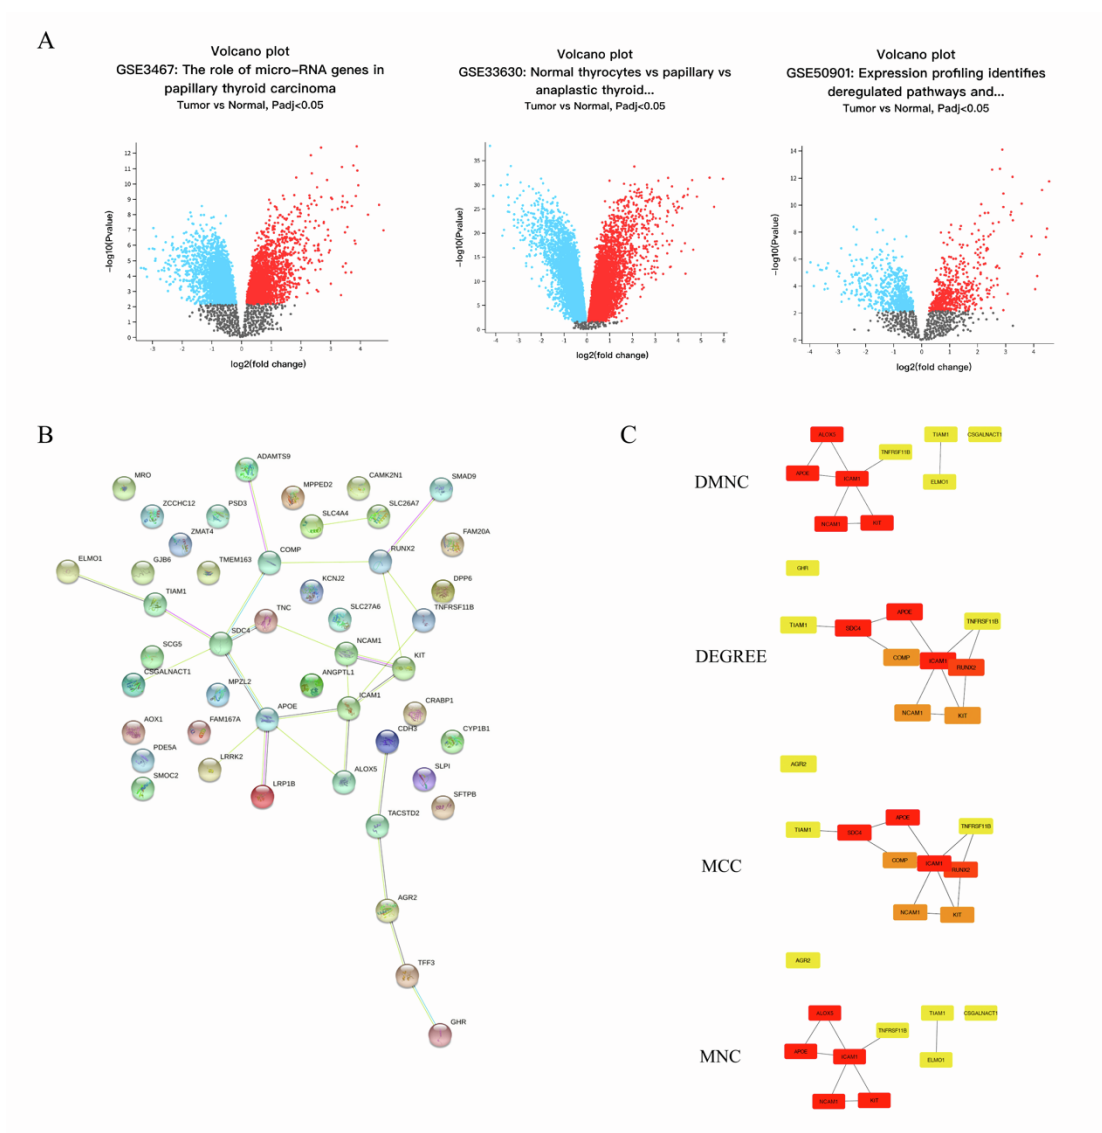

**Figure S2. ICAM1 is overexpressed in ATC samples. Related to Figure 1. (A)**

Volcano plots of the differential expression analysis for GSE33630, GSE53072 and GSE65144; (B) mRNA level of ICAM1 in ATC compared with normal thyroid tissue; (C) ICAM1 mRNA level in ATC samples was significantly high than PTC and normal thyroid in GSE33630. Students' T test was employed in supplement figures 2C; \*  $p < 0.05$ ; \*\*\*  $p < 0.001$ .

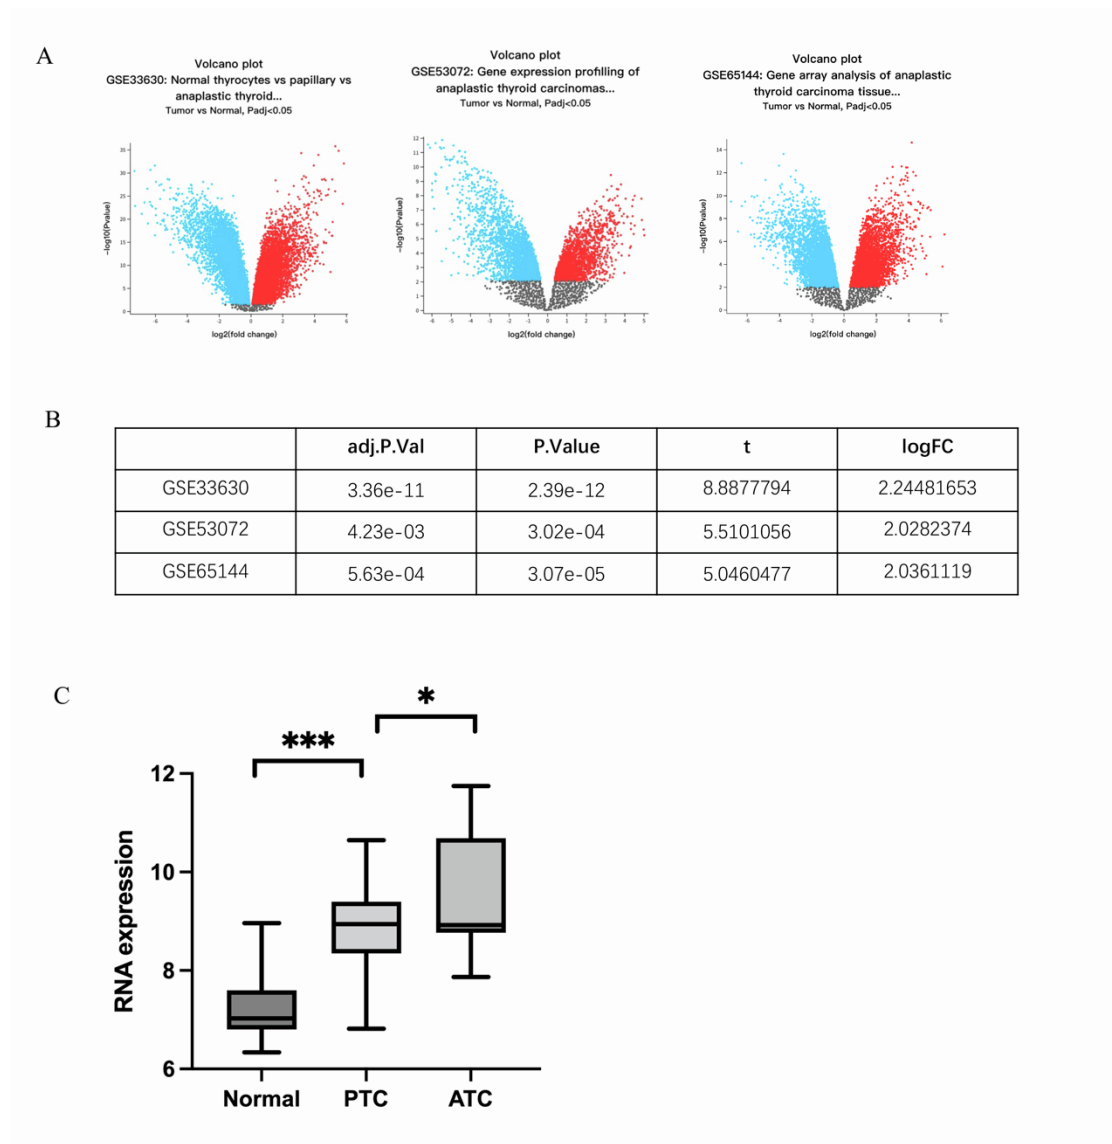

**Figure S3. ICAM1-ADCs eradicate PTC and ATC tumors *in vivo*. Related to Figure 6.** (A) Image of excised subcutaneous IHH4; (B) Image of excised subcutaneous 8505C; (C) H&E staining of main organs, including heart, lung, liver, spleen and kidney in ICAM1 antibody and paclitaxel group, scale bar equals to 20  $\mu\text{m}$ ; (H) blood chemistry parameters (TB and BUN) measured when treated mice were sacrificed in different groups.

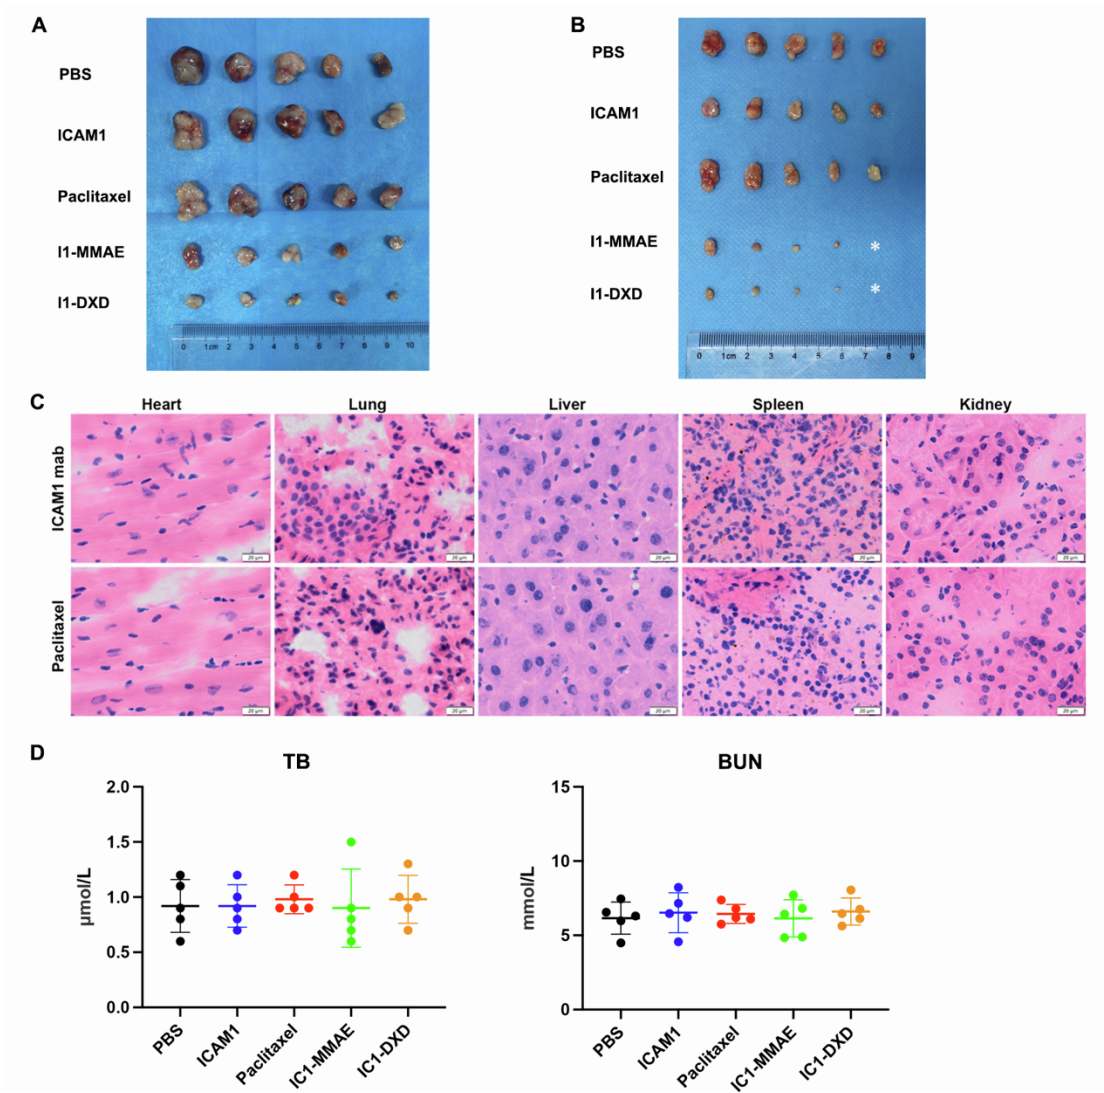

**Table S1. Top10 hub gene by Cytoscape with different methods. Related to Figure**

**1.**

| Genes       | MCC Score          | Genes      | EPC Score       | Genes       | MNC Score       | Genes       | DMNC Score   | Genes      | Degree Score      |
|-------------|--------------------|------------|-----------------|-------------|-----------------|-------------|--------------|------------|-------------------|
| ICAM1       | 5                  | ICAM1      | 7.313           | ICAM1       | 2               | ICAM1       | 0.31         | ICAM1      | 5                 |
| APOE        | 5                  | APOE       | 7.133           | NCAM 1      | 2               | KIT         | 0.31         | APOE       | 5                 |
| SDC4        | 5                  | SDC4       | 6.941           | ALOX5       | 2               | ALOX5       | 0.31         | SDC4       | 5                 |
| RUNX2       | 4                  | KIT        | 6.558           | APOE        | 2               | APOE        | 0.31         | RUNX2      | 4                 |
| COMP        | 3                  | RUNX2      | 6.536           | KIT         | 2               | NCAM 1      | 0.31         | COMP       | 3                 |
| KIT         | 3                  | NCAM 1     | 6.342           | CSGAL NACT1 | 1               | CSGAL NACT1 | 0            | KIT        | 3                 |
| NCAM 1      | 3                  | COMP       | 6.167           | ELMO1       | 1               | ELMO1       | 0            | NCAM 1     | 3                 |
| TIAM1       | 2                  | ALOX5      | 6.002           | TIAM1       | 1               | TIAM1       | 0            | TIAM1      | 2                 |
| TNFRS F11B  | 2                  | TNFRS F11B | 5.824           | GHR         | 1               | GHR         | 0            | TNFRS F11B | 2                 |
| AGR2        | 2                  | TNC        | 5.746           | TNFRS F11B  | 1               | TNFRS F11B  | 0            | AGR2       | 2                 |
| Genes       | EcCentricity Score | Genes      | Closeness Score | Genes       | Radiality Score | Genes       | Stress Score | Genes      | Betweenness Score |
| COMP        | 0.24               | SDC4       | 10              | SDC4        | 3.18            | SDC4        | 152          | SDC4       | 118.33            |
| SDC4        | 0.24               | APOE       | 9.75            | APOE        | 3.098           | APOE        | 116          | APOE       | 87                |
| CSGAL NACT1 | 0.18               | ICAM1      | 9.33            | COMP        | 2.96            | RUNX2       | 86           | COMP       | 58.66             |
| TIAM1       | 0.18               | COMP       | 8.5             | ICAM1       | 2.96            | COMP        | 84           | RUNX2      | 50.33             |
| ADAM TS9    | 0.18               | RUNX2      | 8.41            | NCAM 1      | 2.78            | ICAM1       | 80           | ICAM1      | 48.66             |
| NCAM 1      | 0.18               | KIT        | 8.03            | TNC         | 2.789           | TIAM1       | 36           | TIAM1      | 30                |
| TNC         | 0.18               | NCAM 1     | 8               | RUNX2       | 2.78            | KIT         | 36           | KIT        | 17.33             |
| ALOX5       | 0.18               | TNC        | 7.58            | KIT         | 2.74            | TNFRS F11B  | 24           | TNC        | 12.66             |
| APOE        | 0.18               | ALOX5      | 7.41            | ALOX5       | 2.70            | NCAM 1      | 20           | NCAM 1     | 11.66             |
| ICAM1       | 0.18               | TNFRS F11B | 7.36            | TNFRS F11B  | 2.65            | TNC         | 20           | TNFRS F11B | 9.33              |

**Table S2. Gene list of thyroid differentiation score and MAPK pathway activity score. Related to Figure 1.**

| Thyroid differentiation score |                                      | MAPK pathway activity score |                                    |
|-------------------------------|--------------------------------------|-----------------------------|------------------------------------|
| Gene symbol                   | Gene full name                       | Gene symbol                 | Gene full name                     |
| DIO1                          | iodothyronine deiodinase 1           | SPRY2                       | sprouty RTK signaling antagonist 2 |
| DIO2                          | iodothyronine deiodinase 2           | SPRY4                       | sprouty RTK signaling antagonist 4 |
| DUOX1                         | dual oxidase 1                       | ETV4                        | ETS variant transcription factor 4 |
| DUOX2                         | dual oxidase 2                       | ETV5                        | ETS variant transcription factor 5 |
| FOXE1                         | forkhead box E1                      | DUSP4                       | dual specificity phosphatase 4     |
| GLIS3                         | GLIS family zinc finger 3            | DUSP6                       | dual specificity phosphatase 6     |
| NKX2-1                        | NK2 homeobox 1                       | CCND1                       | cyclin D1                          |
| PAX8                          | paired box 8                         | EPHA2                       | EPH receptor A2                    |
| SLC26A4                       | solute carrier family 26 member 4    | EPHA4                       | EPH receptor A4                    |
| SLC5A5                        | solute carrier family 5 member 5     |                             |                                    |
| SLC5A8                        | solute carrier family 5 member 8     |                             |                                    |
| TG                            | thyroglobulin                        |                             |                                    |
| THRA                          | thyroid hormone receptor alpha       |                             |                                    |
| THRB                          | thyroid hormone receptor beta        |                             |                                    |
| TPO                           | thyroid peroxidase                   |                             |                                    |
| TSHR                          | thyroid stimulating hormone receptor |                             |                                    |

**Table S3. Top 5 most overexpressed antigens in unbiased screening of thyroid cancer-related antigens on PTC and ATC cells. Related to Figure 2.**

| PTC cell line |        | ATC cell line |       |
|---------------|--------|---------------|-------|
| BCPAP         | IHH4   | 8505C         | TCO1  |
| ICAM1         | ICAM1  | ICAM1         | PD-L1 |
| PD-L1         | PD-L1  | PD-L1         | ICAM1 |
| ROR1          | MUC-1  | CXCR4         | TROP2 |
| MUC-1         | VEGFR2 | ROR1          | MUC-1 |
| VEGFR2        | TROP2  | TROP2         | CD66a |
